# Supplementary material
Source: Springer Nature journal article supplement (https://www.springermedizin.de/resource/supplementary/12916_2008_160_MOESM10_ESM.pdf/9599294)
Supplement: MOESM10 [file 9599294]

**A**

Cancer Cell

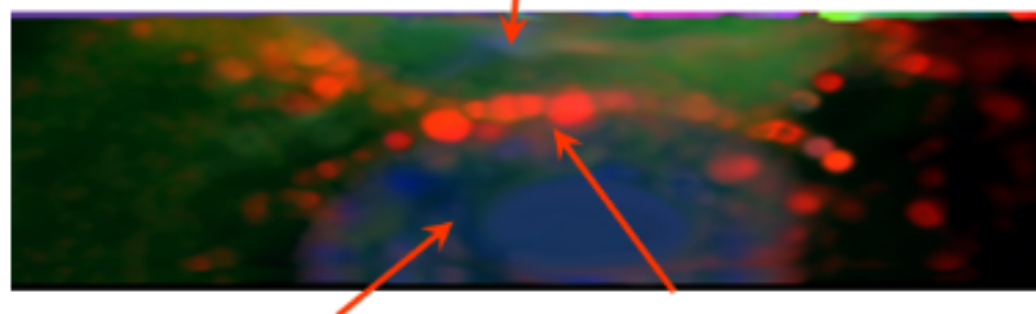

Endothelial Cell

Cx43 Expression in Contact Area

**B**

Cancer Cell

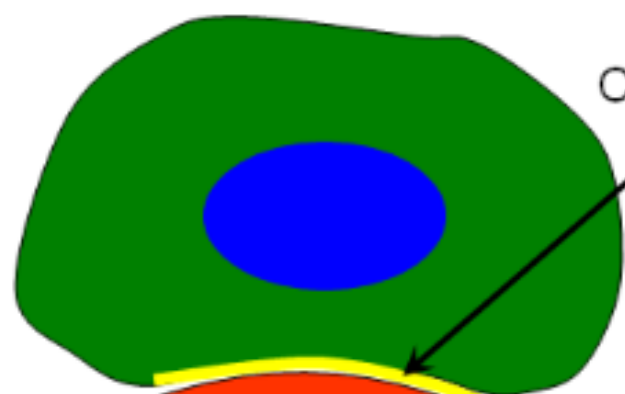

Cancer Cell-EC Attachment Area

Tight Junction Belt

Endothelial Cells

EC-EC Gap Junction Area
